# Supplementary material for: Taxonomic reassessment of the genus Dichotomius (Coleoptera: Scarabaeinae) through integrative taxonomy
Source: PeerJ. 2019 Aug 5;7:e7332. doi: 10.7717/peerj.7332 (PMC6686840; doi:10.7717/peerj.7332)
Supplement: Table S1 — The type of data and source for each specimen is indicated. [file peerj-07-7332-s008.xlsx]

## Sheet: Samples
Source	Specimen number	Species	Subgenus	Species group	Collection details			Analysis
					Location name	Latitude	Longitude	Morphology	Molecular
									COI - 3' end	COI - 5' end	28S	16S
This study - Colección Alejandro Lopera	E196	Dichotomius agenor	Selenocopris	Agenor	La Vega - Cundinamarca - Colombia	5° 0'1.90"N	74°20'21.98"W	✓	MK614968	MK628604	MK614943	✗
This study - Colección Alejandro Lopera	E197	Dichotomius agenor	Selenocopris	Agenor	La Vega - Cundinamarca - Colombia	5° 0'1.90"N	74°20'21.98"W	✓	MK614969	MK628602	✗	✗
This study - Colección Alejandro Lopera	E199	Dichotomius agenor	Selenocopris	Agenor	La Vega - Cundinamarca - Colombia	5° 0'1.90"N	74°20'21.98"W	✓	MK614970	MK628603	✗	✗
This study - Colección Alejandro Lopera	131	Dichotomius agenor	Selenocopris	Agenor	Villa Vieja - Huila - Colombia	3º13'50.5" N	75º9'25" W	✓	✗	✗	✗	✗
This study - Colección Alejandro Lopera	149	Dichotomius agenor	Selenocopris	Agenor	Villa Vieja - Huila - Colombia	3º13'50.5" N	75º9'25" W	✓	✗	✗	✗	✗
This study - Colección Alejandro Lopera	150	Dichotomius agenor	Selenocopris	Agenor	Villa Vieja - Huila - Colombia	3º13'50.5" N	75º9'25" W	✓	✗	✗	✗	✗
This study - Colección Alejandro Lopera	151	Dichotomius agenor	Selenocopris	Agenor	El cardonal - Armero, Guayabal - Tolima	5°4'36.84" N	74°47'8.73" W	✓	✗	✗	✗	✗
This study - Colección Alejandro Lopera	152	Dichotomius agenor	Selenocopris	Agenor	El cardonal - Armero, Guayabal - Tolima	5°4'36.84" N	74°47'8.73" W	✓	✗	✗	✗	✗
This study - Colección Alejandro Lopera	145	Dichotomius agenor	Selenocopris	Agenor	Acacías - Meta - Colombia	3º59'54" N	73º36'49" W	✓	✗	✗	✗	✗
This study - Colección Alejandro Lopera	146	Dichotomius agenor	Selenocopris	Agenor	Acacías - Meta - Colombia	3º59'54" N	73º36'49" W	✓	✗	✗	✗	✗
This study - Colección Alejandro Lopera	147	Dichotomius agenor	Selenocopris	Agenor	Vista Hermosa - Meta - ColombiA	3º02' N	73º35' W	✓	✗	✗	✗	✗
This study - Colección Alejandro Lopera	148	Dichotomius agenor	Selenocopris	Agenor	Cubarral - Meta - Colombia	3º19'32" N	73º49'16" W	✓	✗	✗	✗	✗
GenBank	BMNH668598	Dichotomius amplicollis	Selenocopris	Agenor	NA	NA	NA	✗	JQ972162.1	✗	✗	✗
GenBank	BMNH668642	Dichotomius amplicollis	Selenocopris	Agenor	NA	NA	NA	✗	JQ972178.1	✗	✗	✗
GenBank	BMNH669382	Dichotomius amplicollis	Selenocopris	Agenor	NA	NA	NA	✗	JQ972250.1	✗	✗	✗
GenBank	BMNH669384	Dichotomius amplicollis	Selenocopris	Agenor	NA	NA	NA	✗	JQ972251.1	✗	✗	✗
GenBank	BMNH900205	Dichotomius amplicollis	Selenocopris	Agenor	NA	NA	NA	✗	JQ972335.1	✗	✗	✗
GenBank	BMNH900238	Dichotomius amplicollis	Selenocopris	Agenor	NA	NA	NA	✗	JQ972352.1	✗	✗	✗
GenBank	BMNH900239	Dichotomius amplicollis	Selenocopris	Agenor	NA	NA	NA	✗	JQ972353.1	✗	✗	✗
GenBank	BMNH900257	Dichotomius amplicollis	Selenocopris	Agenor	NA	NA	NA	✗	JQ972369.1	✗	✗	✗
GenBank	BMNH900277	Dichotomius amplicollis	Selenocopris	Agenor	NA	NA	NA	✗	JQ972387.1	✗	✗	✗
GenBank	BMNH900303	Dichotomius amplicollis	Selenocopris	Agenor	NA	NA	NA	✗	JQ972400.1	✗	✗	✗
GenBank	BMNH900304	Dichotomius amplicollis	Selenocopris	Agenor	NA	NA	NA	✗	JQ972401.1	✗	✗	✗
GenBank	BMNH900339	Dichotomius amplicollis	Selenocopris	Agenor	NA	NA	NA	✗	JQ972425.1	✗	✗	✗
GenBank	BMNH900340	Dichotomius amplicollis	Selenocopris	Agenor	NA	NA	NA	✗	JQ972426.1	✗	✗	✗
GenBank	BMNH900342	Dichotomius amplicollis	Selenocopris	Agenor	NA	NA	NA	✗	JQ972428.1	✗	✗	✗
GenBank	BMNH900378	Dichotomius amplicollis	Selenocopris	Agenor	NA	NA	NA	✗	JQ972459.1	✗	✗	✗
GenBank	BMNH900379	Dichotomius amplicollis	Selenocopris	Agenor	NA	NA	NA	✗	JQ972460.1	✗	✗	✗
GenBank	BMNH900380	Dichotomius amplicollis	Selenocopris	Agenor	NA	NA	NA	✗	JQ972461.1	✗	✗	✗
GenBank	BMNH900388	Dichotomius amplicollis	Selenocopris	Agenor	NA	NA	NA	✗	JQ972468.1	✗	✗	✗
GenBank	BMNH900419	Dichotomius amplicollis	Selenocopris	Agenor	NA	NA	NA	✗	JQ972488.1	✗	✗	✗
GenBank	BMNH900420	Dichotomius amplicollis	Selenocopris	Agenor	NA	NA	NA	✗	JQ972489.1	✗	✗	✗
This study - Colección de Artrópodos Universidad del Rosario	E232	Dichotomius alyattes	Dichotomius s.s.	Mormon	Armenia - Quindío - Colombia	4°32'6.00"N	75°40'32.48" W	✗	MK614975	MK628643	MK614946	✗
This study - Colección de Artrópodos Universidad del Rosario	E233	Dichotomius alyattes	Dichotomius s.s.	Mormon	Armenia - Quindío - Colombia	4°32'6.00"N	75°40'32.48" W	✓	MK614976	✗	MK614947	✗
This study - Colección Alejandro Lopera	132	Dichotomius amicitiae	Dichotomius s.s.	Carolinus	Estación San Ramón - Alajú - Costa Rica	NA	NA	✓	✗	✗	✗	✗
This study - Colección de Artrópodos Universidad del Rosario	E279	Dichotomius andresi	Dichotomius s.s.	Mormon	Reserva agroecologica Santa Librada - Tolima - Colombia	3°37'13.23"N	74°52'1.28"W	✗	MK614973	MK628608	✗	✗
This study - Colección de Artrópodos Universidad del Rosario	E282	Dichotomius andresi	Dichotomius s.s.	Mormon	Reserva agroecologica Santa Librada - Tolima - Colombia	3°37'13.23"N	74°52'1.28"W	✗	✗	MK628609	✗	✗
This study - Colección de Artrópodos Universidad del Rosario	E283	Dichotomius andresi	Dichotomius s.s.	Mormon	Reserva agroecologica Santa Librada - Tolima - Colombia	3°37'13.23"N	74°52'1.28"W	✗	MK614974	MK628611	✗	✗
This study - Colección de Artrópodos Universidad del Rosario	E284	Dichotomius andresi	Dichotomius s.s.	Mormon	Reserva agroecologica Santa Librada - Tolima - Colombia	3°37'13.23"N	74°52'1.28"W	✗	✗	MK628612	✗	✗
This study - Colección de Artrópodos Universidad del Rosario	E278	Dichotomius andresi	Dichotomius s.s.	Mormon	Reserva agroecologica Santa Librada - Tolima - Colombia	3°37'13.23"N	74°52'1.28"W	✗	MK614972	MK628610	✗	✗
This study - Colección de Artrópodos Universidad del Rosario	E265	Dichotomius andresi	Dichotomius s.s.	Mormon	Reserva agroecologica Santa Librada - Tolima - Colombia	3°37'13.23"N	74°52'1.28"W	✗	MK614971	MK628613	✗	✗
This study - Colección Alejandro Lopera	122	Dichotomius batesi	Selenocopris	Batesi	Acacías - Meta - Colombia	3º59'54" N	73º36'49" W	✓	✗	✗	✗	✗
This study - Colección Alejandro Lopera	123	Dichotomius batesi	Selenocopris	Batesi	Acacías - Meta - Colombia	3º59'54" N	73º36'49" W	✓	✗	✗	✗	✗
This study - Colección Alejandro Lopera	E194	Dichotomius belus	Selenocopris	Agenor	La Vega - Cundinamarca - Colombia	5° 0'1.90"N	74°20'21.98"W	✓	MK614977	MK628615	✗	✗
This study - Colección Alejandro Lopera	E198	Dichotomius belus	Selenocopris	Agenor	La Vega - Cundinamarca - Colombia	5° 0'1.90"N	74°20'21.98"W	✗	MK614978	✗	MK614944	✗
This study - Colección Alejandro Lopera	E200	Dichotomius belus	Selenocopris	Agenor	La Vega - Cundinamarca - Colombia	5° 0'1.90"N	74°20'21.98"W	✗	MK614979	MK628614	MK614945	✗
This study - Colección de Artrópodos Universidad del Rosario	E272	Dichotomius boreus	Dichotomius s.s.	Boreus	Reserva Natural Tanimboca - Amazonas - Colombia	- 4.18126	- 69.951963	✗	✗	MK628616	✗	✗
This study - Colección de Artrópodos Universidad del Rosario	E273	Dichotomius boreus	Dichotomius s.s.	Boreus	Reserva Natural Tanimboca - Amazonas - Colombia	- 4.18126	- 69.951963	✗	MK614980	MK628617	✗	✗
GenBank	BMNH679799	Dichotomius boreus	Dichotomius s.s.	Boreus	Ecuador	NA	NA	✗	AY131874.1	✗	AY131703.1	AY131514.1
This study - Colección Alejandro Lopera	105	Dichotomius boreus	Dichotomius s.s.	Boreus	Piñalito - Meta - Colombia	3º02' N	73º35' W	✓	✗	✗	✗	✗
This study - Colección Alejandro Lopera	107	Dichotomius boreus	Dichotomius s.s.	Boreus	Piñalito - Meta - Colombia	3º02' N	73º35' W	✓	✗	✗	✗	✗
Bold Systems	BIOUG02023-F12	Dichotomius carolinus	Dichotomius s.s.	Carolinus	Brazos Bend State Park, Texas, USA	NA	NA	✗	✗	BBCCA1022-12.COI-5P	✗	✗
GenBank	S270. UCR	Dichotomius carolinus	Dichotomius s.s.	Carolinus	Georgia, USA	NA	NA	✗	✗	✗	DQ430903.1	✗
This study - Colección Alejandro Lopera	096	Dichotomius coenosus	Dichotomius s.s.	Carolinus	Cúcuta - Norte de Santander - Colombia	7º45'43" N	72º34'09" W	✓	✗	✗	✗	✗
This study - Colección Alejandro Lopera	098	Dichotomius coenosus	Dichotomius s.s.	Carolinus	Isla Danto - Bolivar - Venezuela	7°14'54.97" N	62°51'57.24" W	✓	✗	✗	✗	✗
This study - Colección Alejandro Lopera	099	Dichotomius coenosus	Dichotomius s.s.	Carolinus	Piojo - Atlántico - Colombia	10º45'47" N	75º09'28" W	✓	✗	✗	✗	✗
This study - Colección Alejandro Lopera	100	Dichotomius compresicollis	Dichotomius s.s.	Isolated species	Cubarral - Meta - Colombia	3º19'32" N	73º49'16" W	✓	✗	✗	✗	✗
This study - Colección Alejandro Lopera	101	Dichotomius compresicollis	Dichotomius s.s.	Isolated species	Cubarral - Meta - Colombia	3º19'32" N	73º49'16" W	✓	✗	✗	✗	✗
This study - Colección Alejandro Lopera	121	Dichotomius costaricensis	Dichotomius s.s.	Bitiensis	Piojo - Atlántico - Colombia	10º44'49" N	75º08'48" W	✓	✗	✗	✗	✗
This study - Universidad Distrital - Grupo de Investigación BAM (Biodiversidad de Alta Montaña)	007	Dichotomius deyrollei	Selenocopris	Agenor	Vereda Planas, Hacienda Sinaloa - Meta - Colombia	4.12731	-71.4741	✓	MK614981	MK628601	MK614942	✗
This study - Universidad Distrital - Grupo de Investigación BAM (Biodiversidad de Alta Montaña)	010	Dichotomius deyrollei	Selenocopris	Agenor	Vereda Planas, Hacienda Sinaloa - Meta - Colombia	4.12731	-71.4741	✓	✗	✗	✗	✗
This study - Universidad Distrital - Grupo de Investigación BAM (Biodiversidad de Alta Montaña)	011	Dichotomius deyrollei	Selenocopris	Agenor	Vereda Planas, Hacienda Sinaloa - Meta - Colombia	4.12731	-71.4741	✓	✗	✗	✗	✗
This study - Universidad Distrital - Grupo de Investigación BAM (Biodiversidad de Alta Montaña)	013	Dichotomius deyrollei	Selenocopris	Agenor	Finca Santa Helena, Puerto Gaitán - Meta - Colombia	4.00986	-71.2768	✓	✗	✗	✗	✗
This study - Universidad Distrital - Grupo de Investigación BAM (Biodiversidad de Alta Montaña)	014	Dichotomius deyrollei	Selenocopris	Agenor	Finca Santa Helena, Puerto Gaitán - Meta - Colombia	4.00986	-71.2768	✓	✗	✗	✗	✗
This study - Universidad Distrital - Grupo de Investigación BAM (Biodiversidad de Alta Montaña)	015	Dichotomius deyrollei	Selenocopris	Agenor	Finca Santa Helena, Puerto Gaitán - Meta - Colombia	4.00986	-71.2768	✓	✗	✗	✗	✗
This study - Universidad Distrital - Grupo de Investigación BAM (Biodiversidad de Alta Montaña)	019	Dichotomius deyrollei	Selenocopris	Agenor	Finca Santa Helena, Puerto Gaitán - Meta - Colombia	4.00986	-71.2768	✓	✗	✗	✗	✗
This study - Universidad Distrital - Grupo de Investigación BAM (Biodiversidad de Alta Montaña)	020	Dichotomius deyrollei	Selenocopris	Agenor	Finca Santa Helena, Puerto Gaitán - Meta - Colombia	4.00986	-71.2768	✓	✗	✗	✗	✗
This study - Universidad Distrital - Grupo de Investigación BAM (Biodiversidad de Alta Montaña)	027	Dichotomius deyrollei	Selenocopris	Agenor	Finca Santa Helena, Puerto Gaitán - Meta - Colombia	4.00986	-71.2768	✓	✗	✗	✗	✗
This study - Universidad Distrital - Grupo de Investigación BAM (Biodiversidad de Alta Montaña)	033	Dichotomius deyrollei	Selenocopris	Agenor	Comunidad Campanas, Puerto Gaitán - Meta - Colombia	4.07636	-71.5445	✓	✗	✗	✗	✗
This study - Universidad Distrital - Grupo de Investigación BAM (Biodiversidad de Alta Montaña)	034	Dichotomius deyrollei	Selenocopris	Agenor	Comunidad Campanas, Puerto Gaitán - Meta - Colombia	4.07636	-71.5445	✓	✗	✗	✗	✗
This study - Universidad Distrital - Grupo de Investigación BAM (Biodiversidad de Alta Montaña)	043	Dichotomius deyrollei	Selenocopris	Agenor	Finca Santa Helena, Puerto Gaitán - Meta - Colombia	4.00986	-71.2768	✓	✗	✗	✗	✗
This study - Universidad Distrital - Grupo de Investigación BAM (Biodiversidad de Alta Montaña)	044	Dichotomius deyrollei	Selenocopris	Agenor	Finca Santa Helena, Puerto Gaitán - Meta - Colombia	4.00986	-71.2768	✓	✗	✗	✗	✗
This study - Universidad Distrital - Grupo de Investigación BAM (Biodiversidad de Alta Montaña)	045	Dichotomius deyrollei	Selenocopris	Agenor	Finca Santa Helena, Puerto Gaitán - Meta - Colombia	4.00986	-71.2768	✓	✗	✗	✗	✗
This study - Universidad Distrital - Grupo de Investigación BAM (Biodiversidad de Alta Montaña)	046	Dichotomius deyrollei	Selenocopris	Agenor	Finca Santa Helena, Puerto Gaitán - Meta - Colombia	4.00986	-71.2768	✓	✗	✗	✗	✗
This study - Colección Alejandro Lopera	134	Dichotomius deyrollei	Selenocopris	Agenor	Villa Marina - Norte de Santander - Colombia	7°31'56.11" N	72°38'11.28" W	✓	✗	✗	✗	✗
This study - Colección Alejandro Lopera	114	Dichotomius divergens	Dichotomius s.s.	Mormon	Amargal - Chocó - Colombia	5°34'22.29" N	77°30'6.99" W	✓	✗	✗	✗	✗
This study - Colección Alejandro Lopera	115	Dichotomius divergens	Dichotomius s.s.	Mormon	Amargal - Chocó - Colombia	5°34'22.29" N	77°30'6.99" W	✓	✗	✗	✗	✗
This study - Colección Alejandro Lopera	116	Dichotomius divergens	Dichotomius s.s.	Mormon	Barbacoas - Nariño - Colombia	1º25'59.88" N	78º4'59.88" W	✓	✗	✗	✗	✗
This study - Colección Alejandro Lopera	127	Dichotomius favi	Selenocopris	Batesi	Amargal - Chocó - Colombia	5°34'22.29" N	77°30'6.99" W	✓	✗	✗	✗	✗
This study - Colección Alejandro Lopera	130	Dichotomius fonsecae	Cephagonus	Fissus	Puerto Solano - Caquetá - Colombia	0º12'42.8" N	72º25'3" W	✓	✗	✗	✗	✗
This study - Colección Alejandro Lopera	137	Dichotomius fortestriatus	Selenocopris	Batesi	Caparú - Vaupés - Colombia	1° 4'25.71" S	69°30'17.13" W	✓	✗	✗	✗	✗
This study - Colección Alejandro Lopera	138	Dichotomius fortestriatus	Selenocopris	Batesi	Caparú - Vaupés - Colombia	1° 4'25.71" S	69°30'17.13" W	✓	✗	✗	✗	✗
This study - Colección Alejandro Lopera	153	Dichotomius inachoides	Selenocopris	Agenor	Cucutilla - Norte de Santander - Colombia	7º28'11" N	72º50' W	✓	✗	✗	✗	✗
This study - Colección Alejandro Lopera	154	Dichotomius inachoides	Selenocopris	Agenor	Palestina - Huila - Colombia	01º39'54" N	76º08'28" W	✓	✗	✗	✗	✗
This study - Colección de Artrópodos Universidad del Rosario	E264	Dichotomius mamillatus	Dichotomius s.s.	Mamillatus	Reserva agroecologica Santa Librada - Tolima - Colombia	3°37'13.23"N	74°52'1.28"W	✗	MK614982	✗	MK614964	✗
This study - Colección de Artrópodos Universidad del Rosario	E268	Dichotomius mamillatus	Dichotomius s.s.	Mamillatus	Reserva Natural Tanimboca - Amazonas - Colombia	- 4.18126	- 69.951963	✓	MK614983	MK628618	MK614965	✗
This study - Colección de Artrópodos Universidad del Rosario	E271	Dichotomius mamillatus	Dichotomius s.s.	Mamillatus	Reserva Natural Tanimboca - Amazonas - Colombia	- 4.18126	- 69.951963	✓	MK614984	✗	✗	✗
This study - Colección de Artrópodos Universidad del Rosario	E274	Dichotomius mamillatus	Dichotomius s.s.	Mamillatus	Reserva Natural Tanimboca - Amazonas - Colombia	- 4.18126	- 69.951963	✗	MK614985	MK628619	✗	✗
This study - Universidad Distrital - Grupo de Investigación BAM (Biodiversidad de Alta Montaña)	088	Dichotomius mamillatus	Dichotomius s.s.	Mamillatus	Hacienda Sinaloa, Puerto Gaitán - Meta - Colombia	4.13272	-71.4614	✗	✗	✗	✗	✗
This study - Universidad Distrital - Grupo de Investigación BAM (Biodiversidad de Alta Montaña)	003	Dichotomius mamillatus	Dichotomius s.s.	Mamillatus	Vereda Planas, Hacienda Sinaloa - Meta - Colombia	4.12731	-71.4741	✓	✗	✗	✗	✗
This study - Universidad Distrital - Grupo de Investigación BAM (Biodiversidad de Alta Montaña)	008	Dichotomius mamillatus	Dichotomius s.s.	Mamillatus	Finca Santa Helena, Puerto Gaitán - Meta - Colombia	4.00986	-71.2768	✓	✗	✗	✗	✗
This study - Universidad Distrital - Grupo de Investigación BAM (Biodiversidad de Alta Montaña)	012	Dichotomius mamillatus	Dichotomius s.s.	Mamillatus	Finca Santa Helena, Puerto Gaitán - Meta - Colombia	4.00986	-71.2768	✓	✗	✗	✗	✗
This study - Universidad Distrital - Grupo de Investigación BAM (Biodiversidad de Alta Montaña)	016	Dichotomius mamillatus	Dichotomius s.s.	Mamillatus	Finca Santa Helena, Puerto Gaitán - Meta - Colombia	4.00986	-71.2768	✓	✗	✗	✗	✗
This study - Universidad Distrital - Grupo de Investigación BAM (Biodiversidad de Alta Montaña)	017	Dichotomius mamillatus	Dichotomius s.s.	Mamillatus	Finca Santa Helena, Puerto Gaitán - Meta - Colombia	4.00986	-71.2768	✓	✗	✗	✗	✗
This study - Universidad Distrital - Grupo de Investigación BAM (Biodiversidad de Alta Montaña)	018	Dichotomius mamillatus	Dichotomius s.s.	Mamillatus	Finca Santa Helena, Puerto Gaitán - Meta - Colombia	4.00986	-71.2768	✓	✗	✗	✗	✗
This study - Universidad Distrital - Grupo de Investigación BAM (Biodiversidad de Alta Montaña)	021	Dichotomius mamillatus	Dichotomius s.s.	Mamillatus	Finca Santa Helena, Puerto Gaitán - Meta - Colombia	4.00986	-71.2768	✓	✗	✗	✗	✗
This study - Universidad Distrital - Grupo de Investigación BAM (Biodiversidad de Alta Montaña)	022	Dichotomius mamillatus	Dichotomius s.s.	Mamillatus	Finca Santa Helena, Puerto Gaitán - Meta - Colombia	4.00986	-71.2768	✓	✗	✗	✗	✗
This study - Universidad Distrital - Grupo de Investigación BAM (Biodiversidad de Alta Montaña)	023	Dichotomius mamillatus	Dichotomius s.s.	Mamillatus	Finca Santa Helena, Puerto Gaitán - Meta - Colombia	4.00986	-71.2768	✓	✗	✗	✗	✗
This study - Universidad Distrital - Grupo de Investigación BAM (Biodiversidad de Alta Montaña)	024	Dichotomius mamillatus	Dichotomius s.s.	Mamillatus	Finca Santa Helena, Puerto Gaitán - Meta - Colombia	4.00956	-71.276	✓	✗	✗	✗	✗
This study - Universidad Distrital - Grupo de Investigación BAM (Biodiversidad de Alta Montaña)	025	Dichotomius mamillatus	Dichotomius s.s.	Mamillatus	Finca Santa Helena, Puerto Gaitán - Meta - Colombia	4.00956	-71.276	✓	✗	✗	✗	✗
This study - Universidad Distrital - Grupo de Investigación BAM (Biodiversidad de Alta Montaña)	026	Dichotomius mamillatus	Dichotomius s.s.	Mamillatus	Finca Santa Helena, Puerto Gaitán - Meta - Colombia	4.00956	-71.276	✓	✗	✗	✗	✗
This study - Universidad Distrital - Grupo de Investigación BAM (Biodiversidad de Alta Montaña)	032	Dichotomius mamillatus	Dichotomius s.s.	Mamillatus	Comunidad Campanas, Puerto Gaitán - Meta - Colombia	4.07636	-71.5445	✓	✗	✗	✗	✗
This study - Universidad Distrital - Grupo de Investigación BAM (Biodiversidad de Alta Montaña)	042	Dichotomius mamillatus	Dichotomius s.s.	Mamillatus	Vereda Planas, Hacienda Sinaloa - Meta - Colombia	4.13272	-71.4614	✓	✗	✗	✗	✗
This study - Universidad Distrital - Grupo de Investigación BAM (Biodiversidad de Alta Montaña)	055	Dichotomius mamillatus	Dichotomius s.s.	Mamillatus	Finca Santa Helena, Puerto Gaitán - Meta - Colombia	4.00956	-71.276	✓	✗	✗	✗	✗
This study - Universidad Distrital - Grupo de Investigación BAM (Biodiversidad de Alta Montaña)	081	Dichotomius mamillatus	Dichotomius s.s.	Mamillatus	Finca Santa Helena, Puerto Gaitán - Meta - Colombia	4.00956	-71.276	✓	✗	✗	✗	✗
This study - Universidad Distrital - Grupo de Investigación BAM (Biodiversidad de Alta Montaña)	083	Dichotomius mamillatus	Dichotomius s.s.	Mamillatus	Finca Santa Helena, Puerto Gaitán - Meta - Colombia	4.00986	-71.2768	✓	✗	✗	✗	✗
This study - Universidad Distrital - Grupo de Investigación BAM (Biodiversidad de Alta Montaña)	088	Dichotomius mamillatus	Dichotomius s.s.	Mamillatus	Vereda Planas, Hacienda Sinaloa - Meta - Colombia	4.13272	-71.4614	✓	✗	✗	✗	✗
This study - Universidad Distrital - Grupo de Investigación BAM (Biodiversidad de Alta Montaña)	094	Dichotomius mamillatus	Dichotomius s.s.	Mamillatus	Finca Santa Helena, Puerto Gaitán - Meta - Colombia	4.00992	-71.2764	✓	✗	✗	✗	✗
This study - Universidad Distrital - Grupo de Investigación BAM (Biodiversidad de Alta Montaña)	095	Dichotomius mamillatus	Dichotomius s.s.	Mamillatus	Finca Santa Helena, Puerto Gaitán - Meta - Colombia	4.00992	-71.2764	✓	✗	✗	✗	✗
GenBank	NA	Dichotomius nisus	Selenocopris	Isolated species	Brasil	NA	NA	✗	✗	✗	✗	HQ824538.1
This study - Universidad Distrital - Grupo de Investigación BAM (Biodiversidad de Alta Montaña)	030	Dichotomius nisus	Selenocopris	Isolated species	Vereda Planas, Hacienda Sinaloa - Meta - Colombia	4.11294	-71.4687	✓	MK614986	MK628629	✗	✗
This study - Universidad Distrital - Grupo de Investigación BAM (Biodiversidad de Alta Montaña)	001	Dichotomius nisus	Selenocopris	Isolated species	Vereda Planas, Hacienda Sinaloa - Meta - Colombia	4.11294	-71.4687	✓	✗	✗	✗	✗
This study - Universidad Distrital - Grupo de Investigación BAM (Biodiversidad de Alta Montaña)	002	Dichotomius nisus	Selenocopris	Isolated species	Vereda Planas, Hacienda Sinaloa - Meta - Colombia	4.11294	-71.4687	✓	✗	✗	✗	✗
This study - Universidad Distrital - Grupo de Investigación BAM (Biodiversidad de Alta Montaña)	029	Dichotomius nisus	Selenocopris	Isolated species	Vereda Planas, Hacienda Sinaloa - Meta - Colombia	4.11383	-71.4679	✓	✗	✗	✗	✗
This study - Universidad Distrital - Grupo de Investigación BAM (Biodiversidad de Alta Montaña)	031	Dichotomius nisus	Selenocopris	Isolated species	Vereda Planas, Hacienda Sinaloa - Meta - Colombia	4.11383	-71.4679	✓	✗	✗	✗	✗
This study - Universidad Distrital - Grupo de Investigación BAM (Biodiversidad de Alta Montaña)	036	Dichotomius nisus	Selenocopris	Isolated species	Vereda Planas, Hacienda Sinaloa - Meta - Colombia	4.11383	-71.4679	✓	✗	✗	✗	✗
This study - Universidad Distrital - Grupo de Investigación BAM (Biodiversidad de Alta Montaña)	037	Dichotomius nisus	Selenocopris	Isolated species	Vereda Planas, Hacienda Sinaloa - Meta - Colombia	4.11383	-71.4679	✓	✗	✗	✗	✗
This study - Universidad Distrital - Grupo de Investigación BAM (Biodiversidad de Alta Montaña)	039	Dichotomius nisus	Selenocopris	Isolated species	Vereda Planas, Hacienda Sinaloa - Meta - Colombia	4.11383	-71.4679	✓	✗	✗	✗	✗
This study - Universidad Distrital - Grupo de Investigación BAM (Biodiversidad de Alta Montaña)	056	Dichotomius nisus	Selenocopris	Isolated species	Vereda Planas, Hacienda Sinaloa - Meta - Colombia	4.11383	-71.4679	✓	✗	✗	✗	✗
This study - Universidad Distrital - Grupo de Investigación BAM (Biodiversidad de Alta Montaña)	057	Dichotomius nisus	Selenocopris	Isolated species	Vereda Planas, Hacienda Sinaloa - Meta - Colombia	4.11383	-71.4679	✓	✗	✗	✗	✗
This study - Universidad Distrital - Grupo de Investigación BAM (Biodiversidad de Alta Montaña)	058	Dichotomius nisus	Selenocopris	Isolated species	Vereda Planas, Hacienda Sinaloa - Meta - Colombia	4.11383	-71.4679	✓	✗	✗	✗	✗
This study - Universidad Distrital - Grupo de Investigación BAM (Biodiversidad de Alta Montaña)	060	Dichotomius nisus	Selenocopris	Isolated species	Vereda Planas, Hacienda Sinaloa - Meta - Colombia	4.11383	-71.4679	✓	✗	✗	✗	✗
This study - Universidad Distrital - Grupo de Investigación BAM (Biodiversidad de Alta Montaña)	062	Dichotomius nisus	Selenocopris	Isolated species	Vereda Planas, Hacienda Sinaloa - Meta - Colombia	4.11383	-71.4679	✓	✗	✗	✗	✗
This study - Universidad Distrital - Grupo de Investigación BAM (Biodiversidad de Alta Montaña)	064	Dichotomius nisus	Selenocopris	Isolated species	Vereda Planas, Hacienda Sinaloa - Meta - Colombia	4.11383	-71.4679	✓	✗	✗	✗	✗
This study - Universidad Distrital - Grupo de Investigación BAM (Biodiversidad de Alta Montaña)	065	Dichotomius nisus	Selenocopris	Isolated species	Vereda Planas, Hacienda Sinaloa - Meta - Colombia	4.11383	-71.4679	✓	✗	✗	✗	✗
This study - Universidad Distrital - Grupo de Investigación BAM (Biodiversidad de Alta Montaña)	066	Dichotomius nisus	Selenocopris	Isolated species	Vereda Planas, Hacienda Sinaloa - Meta - Colombia	4.11383	-71.4679	✓	✗	✗	✗	✗
This study - Universidad Distrital - Grupo de Investigación BAM (Biodiversidad de Alta Montaña)	068	Dichotomius nisus	Selenocopris	Isolated species	Vereda Planas, Hacienda Sinaloa - Meta - Colombia	4.11383	-71.4679	✓	✗	✗	✗	✗
This study - Universidad Distrital - Grupo de Investigación BAM (Biodiversidad de Alta Montaña)	069	Dichotomius nisus	Selenocopris	Isolated species	Vereda Planas, Hacienda Sinaloa - Meta - Colombia	4.11383	-71.4679	✓	✗	✗	✗	✗
This study - Universidad Distrital - Grupo de Investigación BAM (Biodiversidad de Alta Montaña)	072	Dichotomius nisus	Selenocopris	Isolated species	Vereda Planas, Hacienda Sinaloa - Meta - Colombia	4.11383	-71.4679	✓	✗	✗	✗	✗
This study - Universidad Distrital - Grupo de Investigación BAM (Biodiversidad de Alta Montaña)	073	Dichotomius nisus	Selenocopris	Isolated species	Vereda Planas, Hacienda Sinaloa - Meta - Colombia	4.11383	-71.4679	✓	✗	✗	✗	✗
This study - Universidad Distrital - Grupo de Investigación BAM (Biodiversidad de Alta Montaña)	074	Dichotomius nisus	Selenocopris	Isolated species	Vereda Planas, Hacienda Sinaloa - Meta - Colombia	4.11383	-71.4679	✓	✗	✗	✗	✗
This study - Universidad Distrital - Grupo de Investigación BAM (Biodiversidad de Alta Montaña)	075	Dichotomius nisus	Selenocopris	Isolated species	Vereda Planas, Hacienda Sinaloa - Meta - Colombia	4.11383	-71.4679	✓	✗	✗	✗	✗
This study - Universidad Distrital - Grupo de Investigación BAM (Biodiversidad de Alta Montaña)	076	Dichotomius nisus	Selenocopris	Isolated species	Vereda Planas, Hacienda Sinaloa - Meta - Colombia	4.11383	-71.4679	✓	✗	✗	✗	✗
This study - Universidad Distrital - Grupo de Investigación BAM (Biodiversidad de Alta Montaña)	077	Dichotomius nisus	Selenocopris	Isolated species	Vereda Planas, Hacienda Sinaloa - Meta - Colombia	4.11383	-71.4679	✓	✗	✗	✗	✗
This study - Universidad Distrital - Grupo de Investigación BAM (Biodiversidad de Alta Montaña)	084	Dichotomius nisus	Selenocopris	Isolated species	Vereda Planas, Hacienda Sinaloa - Meta - Colombia	4.11383	-71.4679	✓	✗	✗	✗	✗
This study - Universidad Distrital - Grupo de Investigación BAM (Biodiversidad de Alta Montaña)	085	Dichotomius nisus	Selenocopris	Isolated species	Vereda Planas, Hacienda Sinaloa - Meta - Colombia	4.11383	-71.4679	✓	✗	✗	✗	✗
This study - Universidad Distrital - Grupo de Investigación BAM (Biodiversidad de Alta Montaña)	086	Dichotomius nisus	Selenocopris	Isolated species	Vereda Planas, Hacienda Sinaloa - Meta - Colombia	4.11383	-71.4679	✓	✗	✗	✗	✗
This study - Universidad Distrital - Grupo de Investigación BAM (Biodiversidad de Alta Montaña)	087	Dichotomius nisus	Selenocopris	Isolated species	Vereda Planas, Hacienda Sinaloa - Meta - Colombia	4.11383	-71.4679	✓	✗	✗	✗	✗
This study - Colección Alejandro Lopera	108	Dichotomius ohausi	Dichotomius s.s.	Mormon	San José del Guiaviare - Guaviare - Colombia	2º21'46" N	72º38'29" W	✓	✗	✗	✗	✗
This study - Colección Alejandro Lopera	109	Dichotomius ohausi	Dichotomius s.s.	Mormon	San José del Guiaviare - Guaviare - Colombia	2º21'46" N	72º38'29" W	✓	✗	✗	✗	✗
GenBank	BMNH679800	Dichotomius parcepunctatus	Selenocopris	Batesi	Ecuador	NA	NA	✗	AY131875.1	✗	AY131704.1	AY131515.1
This study - Universidad Distrital - Grupo de Investigación BAM (Biodiversidad de Alta Montaña)	028	Dichotomius podalirius	Dichotomius s.s.	Boreus	Finca Santa Helena, Puerto Gaitán - Meta - Colombia	4.00986	-71.2768	✓	✗	✗	MK614966	✗
This study - Colección de Artrópodos Universidad del Rosario	E266	Dichotomius podalirius	Dichotomius s.s.	Boreus	Reserva Natural Tanimboca - Amazonas - Colombia	- 4.18126	- 69.951963	✗	MK614989	MK628623	MK614967	✗
This study - Colección de Artrópodos Universidad del Rosario	004	Dichotomius podalirius	Dichotomius s.s.	Boreus	Finca Santa Helena, Puerto Gaitán - Meta - Colombia	4.00986	-71.2768	✓	✗	✗	✗	✗
This study - Colección de Artrópodos Universidad del Rosario	005	Dichotomius podalirius	Dichotomius s.s.	Boreus	Finca Santa Helena, Puerto Gaitán - Meta - Colombia	4.00986	-71.2768	✓	✗	✗	✗	✗
This study - Universidad Distrital - Grupo de Investigación BAM (Biodiversidad de Alta Montaña)	063	Dichotomius podalirius	Dichotomius s.s.	Boreus	Finca Santa Helena, Puerto Gaitán - Meta - Colombia	4.00986	-71.2768	✓	✗	✗	✗	✗
This study - Universidad Distrital - Grupo de Investigación BAM (Biodiversidad de Alta Montaña)	078	Dichotomius podalirius	Dichotomius s.s.	Boreus	Finca Santa Helena, Puerto Gaitán - Meta - Colombia	4.00986	-71.2768	✓	✗	✗	✗	✗
This study - Universidad Distrital - Grupo de Investigación BAM (Biodiversidad de Alta Montaña)	079	Dichotomius podalirius	Dichotomius s.s.	Boreus	Finca Santa Helena, Puerto Gaitán - Meta - Colombia	4.00986	-71.2768	✓	✗	✗	✗	✗
This study - Colección de Artrópodos Universidad del Rosario	E219	Dichotomius protectus	Dichotomius s.s.	Mormon	Cubarral - Meta - Colombia	03º59'39" N	73º53'15" W	✓	MK614987	MK628621	MK614963	✗
This study - Colección de Artrópodos Universidad del Rosario	E220	Dichotomius protectus	Dichotomius s.s.	Mormon	Cubarral - Meta - Colombia	03º59'39" N	73º53'15" W	✓	MK614988	MK628622	✗	✗
This study - Colección Alejandro Lopera	139	Dichotomius protectus	Dichotomius s.s.	Mormon	Cubarral - Meta - Colombia	03º59'39" N	73º53'15" W	✓	✗	✗	✗	✗
This study - Colección Alejandro Lopera	140	Dichotomius protectus	Dichotomius s.s.	Mormon	Cubarral - Meta - Colombia	03º59'39" N	73º53'15" W	✓	✗	✗	✗	✗
This study - Colección Alejandro Lopera	111	Dichotomius quinquedens	Dichotomius s.s.	Mormon	Laguna Pedro Palo - Cundinamarca - Colombia	4°40'26.14"N	74°23'48.13"W	✓	✗	✗	✗	✗
This study - Colección Alejandro Lopera	112	Dichotomius quinquedens	Dichotomius s.s.	Mormon	Barbacoas - Nariño - Colombia	1º21'51" N	78º10'21" W	✓	✗	✗	✗	✗
This study - Colección Alejandro Lopera	113	Dichotomius quinquedens	Dichotomius s.s.	Mormon	Barbacoas - Nariño - Colombia	1º21'51" N	78º10'21" W	✓	✗	✗	✗	✗
This study - Colección de Artrópodos Universidad del Rosario	E195	Dichotomius quinquelobatus	Dichotomius s.s.	Mormon	Santa María - Boyacá - Colombia	04°51'59.88" N	73°15'28.8"W	✓	MK614990	MK628624	✗	✗
This study - Colección Alejandro Lopera	166	Dichotomius riberoi	Dichotomius s.s.	Buqueti	Piedecuesta - Santander - Colombia	6.9915° N	73.0540° W	✓	✗	✗	✗	✗
This study - Colección Alejandro Lopera	117	Dichotomius robustus	Dichotomius s.s.	Mamillatus	Caño Bocón - Guainía - Colombia	3°40'28.82"N	68° 2'16.71"W	✓	✗	✗	✗	✗
This study - Colección Alejandro Lopera	118	Dichotomius robustus	Dichotomius s.s.	Mamillatus	Caño Bocón - Guainía - Colombia	3°40'28.82"N	68° 2'16.71"W	✓	✗	✗	✗	✗
This study - Colección Alejandro Lopera	119	Dichotomius robustus	Dichotomius s.s.	Mamillatus	Caño Bocón - Guainía - Colombia	3°40'28.82"N	68° 2'16.71"W	✓	✗	✗	✗	✗
This study - Colección Alejandro Lopera	120	Dichotomius robustus	Dichotomius s.s.	Mamillatus	Caño Bocón - Guainía - Colombia	3°40'28.82"N	68° 2'16.71"W	✓	✗	✗	✗	✗
This study - Colección Alejandro Lopera	167	Dichotomius satanas	Dichotomius s.s.	Mormon	Cubarral - Meta - Colombia	03º59'39" N	73º53'15" W	✓	✗	✗	✗	✗
This study - Colección de Artrópodos Universidad del Rosario	E25	Dichotomius satanas	Dichotomius s.s.	Mormon	Cubarral - Meta - Colombia	03º59'39" N	73º53'15" W	✓	✗	✗	✗	✗
This study - Colección de Artrópodos Universidad del Rosario	E30	Dichotomius satanas	Dichotomius s.s.	Mormon	Cubarral - Meta - Colombia	03º59'39" N	73º53'15" W	✓	✗	✗	✗	✗
This study - Colección de Artrópodos Universidad del Rosario	E32	Dichotomius satanas	Dichotomius s.s.	Mormon	Cairo, Salento - Quindío - Colombia	4°38'9.16"N	75°32'53.02"W	✗	MK614999	✗	MK614958	✗
This study - Colección de Artrópodos Universidad del Rosario	E33	Dichotomius satanas	Dichotomius s.s.	Mormon	Cairo, Salento - Quindío - Colombia	4°38'9.16"N	75°32'53.02"W	✗	MK615000	✗	MK614959	✗
This study - Colección de Artrópodos Universidad del Rosario	E34	Dichotomius satanas	Dichotomius s.s.	Mormon	Cairo, Salento - Quindío - Colombia	4°38'9.16"N	75°32'53.02"W	✗	✗	MK628605	MK614948	✗
This study - Colección de Artrópodos Universidad del Rosario	E35	Dichotomius satanas	Dichotomius s.s.	Mormon	Cairo, Salento - Quindío - Colombia	4°38'9.16"N	75°32'53.02"W	✗	MK614995	MK628606	MK614949	✗
This study - Colección de Artrópodos Universidad del Rosario	E37	Dichotomius satanas	Dichotomius s.s.	Mormon	Cairo, Salento - Quindío - Colombia	4°38'9.16"N	75°32'53.02"W	✓	MK614996	MK628607	MK614950	✗
This study - Colección de Artrópodos Universidad del Rosario	E38	Dichotomius satanas	Dichotomius s.s.	Mormon	Planada, Ricaute - Nariño - Colombia	1° 9'28.01"N	77°58'35.69"W	✓	✗	✗	✗	✗
This study - Colección de Artrópodos Universidad del Rosario	E42	Dichotomius satanas	Dichotomius s.s.	Mormon	El Encino - Santander - Colombia	6° 2'58.90"N	73°15'26.89"W	✓	✗	✗	✗	✗
This study - Colección de Artrópodos Universidad del Rosario	E43	Dichotomius satanas	Dichotomius s.s.	Mormon	El Encino - Santander - Colombia	6° 2'58.90"N	73°15'26.89"W	✗	✗	✗	MK614960	✗
This study - Colección de Artrópodos Universidad del Rosario	E45	Dichotomius satanas	Dichotomius s.s.	Mormon	El Encino - Santander - Colombia	6° 2'58.90"N	73°15'26.89"W	✓	✗	✗	✗	✗
This study - Colección de Artrópodos Universidad del Rosario	E50	Dichotomius satanas	Dichotomius s.s.	Mormon	Laguna Pedro Palo - Cundinamarca - Colombia	4°40'26.14"N	74°23'48.13"W	✓	✗	✗	✗	✗
This study - Colección de Artrópodos Universidad del Rosario	E52	Dichotomius satanas	Dichotomius s.s.	Mormon	Laguna Pedro Palo - Cundinamarca - Colombia	4°40'26.14"N	74°23'48.13"W	✓	✗	✗	✗	✗
This study - Colección de Artrópodos Universidad del Rosario	E55	Dichotomius satanas	Dichotomius s.s.	Mormon	La Suiza, Ucumuri - Risaralda - Colombia	4°46'37.57"N	75°36'36.12"W	✓	✗	✗	✗	✗
This study - Colección de Artrópodos Universidad del Rosario	E59	Dichotomius satanas	Dichotomius s.s.	Mormon	Cairo, Salento - Quindío - Colombia	4°38'9.16"N	75°32'53.02"W	✓	✗	✗	✗	✗
This study - Colección de Artrópodos Universidad del Rosario	E61	Dichotomius satanas	Dichotomius s.s.	Mormon	El Encino - Santander - Colombia	6° 2'58.90"N	73°15'26.89"W	✓	✗	✗	✗	✗
This study - Colección de Artrópodos Universidad del Rosario	E62	Dichotomius satanas	Dichotomius s.s.	Mormon	El Encino - Santander - Colombia	6° 2'58.90"N	73°15'26.89"W	✗	MK615001	MK628658	MK614961	✗
This study - Colección de Artrópodos Universidad del Rosario	E64	Dichotomius satanas	Dichotomius s.s.	Mormon	El Encino - Santander - Colombia	6° 2'58.90"N	73°15'26.89"W	✓	✗	✗	✗	✗
This study - Colección de Artrópodos Universidad del Rosario	E68	Dichotomius satanas	Dichotomius s.s.	Mormon	El Encino - Santander - Colombia	6° 2'58.90"N	73°15'26.89"W	✓	✗	✗	✗	✗
This study - Colección de Artrópodos Universidad del Rosario	E69	Dichotomius satanas	Dichotomius s.s.	Mormon	El Encino - Santander - Colombia	6° 2'58.90"N	73°15'26.89"W	✓	✗	✗	✗	✗
This study - Colección de Artrópodos Universidad del Rosario	E70	Dichotomius satanas	Dichotomius s.s.	Mormon	El Encino - Santander - Colombia	6° 2'58.90"N	73°15'26.89"W	✓	MK615010	MK628631	✗	✗
This study - Colección de Artrópodos Universidad del Rosario	E72	Dichotomius satanas	Dichotomius s.s.	Mormon	El Encino - Santander - Colombia	6° 2'58.90"N	73°15'26.89"W	✓	✗	MK628632	✗	✗
This study - Colección de Artrópodos Universidad del Rosario	E73	Dichotomius satanas	Dichotomius s.s.	Mormon	El Encino - Santander - Colombia	6° 2'58.90"N	73°15'26.89"W	✗	✗	MK628659	✗	✗
This study - Colección de Artrópodos Universidad del Rosario	E74	Dichotomius satanas	Dichotomius s.s.	Mormon	El Encino - Santander - Colombia	6° 2'58.90"N	73°15'26.89"W	✗	✗	MK628660	✗	✗
This study - Colección de Artrópodos Universidad del Rosario	E76	Dichotomius satanas	Dichotomius s.s.	Mormon	El Encino - Santander - Colombia	6° 2'58.90"N	73°15'26.89"W	✗	✗	MK628671	✗	✗
This study - Colección de Artrópodos Universidad del Rosario	E77	Dichotomius satanas	Dichotomius s.s.	Mormon	El Encino - Santander - Colombia	6° 2'58.90"N	73°15'26.89"W	✗	✗	MK628672	✗	✗
This study - Colección de Artrópodos Universidad del Rosario	E78	Dichotomius satanas	Dichotomius s.s.	Mormon	El Encino - Santander - Colombia	6° 2'58.90"N	73°15'26.89"W	✗	✗	MK628633	✗	✗
This study - Colección de Artrópodos Universidad del Rosario	E79	Dichotomius satanas	Dichotomius s.s.	Mormon	El Encino - Santander - Colombia	6° 2'58.90"N	73°15'26.89"W	✓	✗	MK628634	✗	✗
This study - Colección de Artrópodos Universidad del Rosario	E88	Dichotomius satanas	Dichotomius s.s.	Mormon	Reserva Natural Mesenia, Jardín - Antioquia - Colombia	5º29'43" N	75º53'38" W	✓	✗	✗	✗	✗
This study - Colección de Artrópodos Universidad del Rosario	E89	Dichotomius satanas	Dichotomius s.s.	Mormon	Reserva Natural Mesenia, Jardín - Antioquia - Colombia	5º29'43" N	75º53'38" W	✓	✗	MK628635	MK614951	✗
This study - Colección de Artrópodos Universidad del Rosario	E90	Dichotomius satanas	Dichotomius s.s.	Mormon	Reserva Natural Mesenia, Jardín - Antioquia - Colombia	5º29'43" N	75º53'38" W	✓	✗	✗	✗	✗
This study - Colección de Artrópodos Universidad del Rosario	E91	Dichotomius satanas	Dichotomius s.s.	Mormon	Reserva Natural Mesenia, Jardín - Antioquia - Colombia	5º29'43" N	75º53'38" W	✗	✗	MK628661	✗	✗
This study - Colección de Artrópodos Universidad del Rosario	E94	Dichotomius satanas	Dichotomius s.s.	Mormon	Reserva Natural las Tangaras, Arusí - Chocó - Colombia	5º49'18" N	76º10'10" W	✓	✗	MK628636	✗	✗
This study - Colección de Artrópodos Universidad del Rosario	E95	Dichotomius satanas	Dichotomius s.s.	Mormon	Reserva Natural las Tangaras, Arusí - Chocó - Colombia	5º49'18" N	76º10'10" W	✓	✗	✗	✗	✗
This study - Colección de Artrópodos Universidad del Rosario	E96	Dichotomius satanas	Dichotomius s.s.	Mormon	Reserva Natural las Tangaras, Arusí - Chocó - Colombia	5º49'18" N	76º10'10" W	✓	✗	MK628637	✗	✗
This study - Colección de Artrópodos Universidad del Rosario	E97	Dichotomius satanas	Dichotomius s.s.	Mormon	Reserva Natural las Tangaras, Arusí - Chocó - Colombia	5º49'18" N	76º10'10" W	✗	✗	MK628662	✗	✗
This study - Colección de Artrópodos Universidad del Rosario	E98	Dichotomius satanas	Dichotomius s.s.	Mormon	Reserva Natural las Tangaras, Arusí - Chocó - Colombia	5º49'18" N	76º10'10" W	✗	✗	MK628663	✗	✗
This study - Colección de Artrópodos Universidad del Rosario	E103	Dichotomius satanas	Dichotomius s.s.	Mormon	Reserva Natural Montezuma, PNN Tatamá - Risaralda, Colombia	5º14'46" N	76º 5' 33" W	✓	✗	✗	✗	✗
This study - Colección de Artrópodos Universidad del Rosario	E104	Dichotomius satanas	Dichotomius s.s.	Mormon	Reserva Natural las Tangaras, Arusí - Chocó - Colombia	5º49'18" N	76º10'10" W	✓	✗	MK628638	✗	✗
This study - Colección de Artrópodos Universidad del Rosario	E105	Dichotomius satanas	Dichotomius s.s.	Mormon	Reserva Natural las Tangaras, Arusí - Chocó - Colombia	5º49'18" N	76º10'10" W	✓	✗	✗	✗	✗
This study - Colección de Artrópodos Universidad del Rosario	E106	Dichotomius satanas	Dichotomius s.s.	Mormon	Reserva Natural las Tangaras, Arusí - Chocó - Colombia	5º49'18" N	76º10'10" W	✗	MK615025	MK628673	✗	✗
This study - Colección de Artrópodos Universidad del Rosario	E115	Dichotomius satanas	Dichotomius s.s.	Mormon	Acevedo, PNN Cueva de los Guácharos - Huila - Colombia	1º37'59"N	76º6'19"W	✓	✗	✗	✗	✗
This study - Colección de Artrópodos Universidad del Rosario	E120	Dichotomius satanas	Dichotomius s.s.	Mormon	Vereda Jericó, Palestina - Huila - Colombia	1º39'54" N	76º8'28" W	✓	✗	✗	✗	✗
This study - Colección de Artrópodos Universidad del Rosario	E122	Dichotomius satanas	Dichotomius s.s.	Mormon	Vereda Jericó, Palestina - Huila - Colombia	1º39'54" N	76º8'28" W	✓	✗	✗	✗	✗
This study - Colección de Artrópodos Universidad del Rosario	E126	Dichotomius satanas	Dichotomius s.s.	Mormon	Arcabuco, El Cometa - Boyacá - Colombia	5º44'N	73º29' W	✓	✗	✗	✗	✗
This study - Colección de Artrópodos Universidad del Rosario	E130	Dichotomius satanas	Dichotomius s.s.	Mormon	PNN Tamá, Toledo - N. de Santander - Colombia	7º7' N	72º13' W	✓	✗	✗	✗	✗
This study - Colección de Artrópodos Universidad del Rosario	E134	Dichotomius satanas	Dichotomius s.s.	Mormon	Arusí, Nuquí - Chocó - Colombia	5º35'22" N	77º30'2' W	✓	✗	✗	✗	✗
This study - Colección de Artrópodos Universidad del Rosario	E137	Dichotomius satanas	Dichotomius s.s.	Mormon	PNN Tamá, Toledo - N. de Santander - Colombia	7º7' N	72º13' W	✓	✗	✗	✗	✗
This study - Colección de Artrópodos Universidad del Rosario	E139	Dichotomius satanas	Dichotomius s.s.	Mormon	Acevedo, PNN Cueva de los Guácharos - Huila - Colombia	1º37'59"N	76º6'19"W	✓	✗	✗	✗	✗
This study - Colección de Artrópodos Universidad del Rosario	E147	Dichotomius satanas	Dichotomius s.s.	Mormon	Los Mayos, Mocoa - Putumayo - Colombia	01º08'N	76º38'W	✓	✗	✗	✗	✗
This study - Colección de Artrópodos Universidad del Rosario	E149	Dichotomius satanas	Dichotomius s.s.	Mormon	La Argentina, San Agustín - Huila - Colombia	1º48'44" N	76º20'29" W	✓	✗	✗	✗	✗
This study - Colección de Artrópodos Universidad del Rosario	E151	Dichotomius satanas	Dichotomius s.s.	Mormon	La ceja - Nariño - Colombia	NA	NA	✓	✗	✗	✗	✗
This study - Colección de Artrópodos Universidad del Rosario	E164	Dichotomius satanas	Dichotomius s.s.	Mormon	Vereda Jericó, Palestina - Huila - Colombia	1º39'54" N	76º8'28" W	✓	✗	✗	✗	✗
This study - Colección de Artrópodos Universidad del Rosario	E166	Dichotomius satanas	Dichotomius s.s.	Mormon	Valle del Río Tatabro, Anchicayá - Valle del Cauca - Colombia	NA	NA	✓	✗	✗	✗	✗
This study - Colección de Artrópodos Universidad del Rosario	E167	Dichotomius satanas	Dichotomius s.s.	Mormon	Valle del Río Tatabro, Anchicayá - Valle del Cauca - Colombia	NA	NA	✓	✗	✗	✗	✗
This study - Colección de Artrópodos Universidad del Rosario	E168	Dichotomius satanas	Dichotomius s.s.	Mormon	Vitaco, La Cumbre - Valle del Cauca - Colombia	3º33'N	76º35'W	✓	✗	✗	✗	✗
This study - Colección de Artrópodos Universidad del Rosario	E169	Dichotomius satanas	Dichotomius s.s.	Mormon	Río Rumiyaco, Mocoa - Putumayo - Colombia	NA	NA	✓	✗	✗	✗	✗
This study - Colección de Artrópodos Universidad del Rosario	E172	Dichotomius satanas	Dichotomius s.s.	Mormon	Barbacoas - Nariño - Colombia	1º21'51" N	78º10'21" W	✓	✗	✗	✗	✗
This study - Colección de Artrópodos Universidad del Rosario	E174	Dichotomius satanas	Dichotomius s.s.	Mormon	Estación Forestal Bajo Calima, Calima - Valle del Cauca - Colombia	NA	NA	✓	✗	✗	✗	✗
This study - Colección de Artrópodos Universidad del Rosario	E176	Dichotomius satanas	Dichotomius s.s.	Mormon	Barbacoas - Nariño - Colombia	1º21'51" N	78º10'21" W	✓	✗	✗	✗	✗
This study - Colección de Artrópodos Universidad del Rosario	E177	Dichotomius satanas	Dichotomius s.s.	Mormon	Hato Tongosoy, Buesaco - Nariño - Colombia	1º22'38" N	77º13'19" W	✓	✗	✗	✗	✗
This study - Colección de Artrópodos Universidad del Rosario	E179	Dichotomius satanas	Dichotomius s.s.	Mormon	Cortijo, Salento - Quindío - Colombia	4º39'03" N	75º38'40" W	✓	✗	✗	✗	✗
This study - Colección de Artrópodos Universidad del Rosario	E181	Dichotomius satanas	Dichotomius s.s.	Mormon	Estación Acaime, Valle del Cocora - Quindío - Colombia	NA	NA	✓	✗	✗	✗	✗
This study - Colección de Artrópodos Universidad del Rosario	E217	Dichotomius satanas	Dichotomius s.s.	Mormon	Cubarral - Meta - Colombia	03º59'39" N	73º53'15" W	✓	MK614998	✗	MK614962	✗
This study - Colección de Artrópodos Universidad del Rosario	E218	Dichotomius satanas	Dichotomius s.s.	Mormon	Cubarral - Meta - Colombia	03º59'39" N	73º53'15" W	✓	MK614997	MK628630	✗	✗
This study - Colección de Artrópodos Universidad del Rosario	E221	Dichotomius satanas	Dichotomius s.s.	Mormon	Cubarral - Meta - Colombia	03º59'39" N	73º53'15" W	✓	MK615026	MK628674	✗	✗
This study - Colección de Artrópodos Universidad del Rosario	E222	Dichotomius satanas	Dichotomius s.s.	Mormon	Cubarral - Meta - Colombia	03º59'39" N	73º53'15" W	✓	MK615027	✗	✗	✗
This study - Colección de Artrópodos Universidad del Rosario	E223	Dichotomius satanas	Dichotomius s.s.	Mormon	Cubarral - Meta - Colombia	03º59'39" N	73º53'15" W	✓	MK615028	MK628675	✗	✗
This study - Colección de Artrópodos Universidad del Rosario	E224	Dichotomius satanas	Dichotomius s.s.	Mormon	Cubarral - Meta - Colombia	03º59'39" N	73º53'15" W	✓	✗	MK628639	MK614952	✗
This study - Colección de Artrópodos Universidad del Rosario	E227	Dichotomius satanas	Dichotomius s.s.	Mormon	Cubarral - Meta - Colombia	03º59'39" N	73º53'15" W	✓	MK615011	MK628640	MK614953	✗
This study - Colección de Artrópodos Universidad del Rosario	E228	Dichotomius satanas	Dichotomius s.s.	Mormon	Cubarral - Meta - Colombia	03º59'39" N	73º53'15" W	✓	MK615012	MK628641	✗	✗
This study - Colección de Artrópodos Universidad del Rosario	E229	Dichotomius satanas	Dichotomius s.s.	Mormon	Cubarral - Meta - Colombia	03º59'39" N	73º53'15" W	✗	MK615002	MK628664	✗	✗
This study - Colección de Artrópodos Universidad del Rosario	E230	Dichotomius satanas	Dichotomius s.s.	Mormon	Cubarral - Meta - Colombia	03º59'39" N	73º53'15" W	✓	MK615008	MK628642	✗	✗
This study - Colección de Artrópodos Universidad del Rosario	E234	Dichotomius satanas	Dichotomius s.s.	Mormon	Armenia - Quindío - Colombia	4°32'6.00"N	75°40'32.48" W	✓	MK615013	MK628644	MK614954	✗
This study - Colección de Artrópodos Universidad del Rosario	E235	Dichotomius satanas	Dichotomius s.s.	Mormon	Armenia - Quindío - Colombia	4°32'6.00"N	75°40'32.48" W	✗	MK615003	MK628665	✗	✗
This study - Colección de Artrópodos Universidad del Rosario	E236	Dichotomius satanas	Dichotomius s.s.	Mormon	Armenia - Quindío - Colombia	4°32'6.00"N	75°40'32.48" W	✗	MK615004	MK628666	✗	✗
This study - Colección de Artrópodos Universidad del Rosario	E239	Dichotomius satanas	Dichotomius s.s.	Mormon	Arcabuco, Pomeca - Boyacá - Colombia	5°44'53.92"N	73°26'0.06"O	✓	MK615014	MK628645	✗	✗
This study - Colección de Artrópodos Universidad del Rosario	E240	Dichotomius satanas	Dichotomius s.s.	Mormon	Arcabuco, Pomeca - Boyacá - Colombia	5°44'53.92"N	73°26'0.06"O	✓	MK615015	MK628646	✗	✗
This study - Colección de Artrópodos Universidad del Rosario	E241	Dichotomius satanas	Dichotomius s.s.	Mormon	Arcabuco, Pomeca - Boyacá - Colombia	5°44'53.92"N	73°26'0.06"O	✗	MK615005	MK628667	✗	✗
This study - Colección de Artrópodos Universidad del Rosario	E242	Dichotomius satanas	Dichotomius s.s.	Mormon	La Honda, Cundinamarca - Colombia	4.2553654 N	74.4233758 W	✗	MK615029	MK628676	✗	✗
This study - Colección de Artrópodos Universidad del Rosario	E243	Dichotomius satanas	Dichotomius s.s.	Mormon	La Honda, Cundinamarca - Colombia	4.2553654 N	74.4233758 W	✗	MK615030	MK628677	MK614957	✗
This study - Colección de Artrópodos Universidad del Rosario	E244	Dichotomius satanas	Dichotomius s.s.	Mormon	La Honda, Cundinamarca - Colombia	4.2553654 N	74.4233758 W	✗	MK615031	MK628678	✗	✗
This study - Colección de Artrópodos Universidad del Rosario	E245	Dichotomius satanas	Dichotomius s.s.	Mormon	La Honda, Cundinamarca - Colombia	4.2553654 N	74.4233758 W	✓	MK615016	MK628647	✗	✗
This study - Colección de Artrópodos Universidad del Rosario	E247	Dichotomius satanas	Dichotomius s.s.	Mormon	La Honda, Cundinamarca - Colombia	4.2553654 N	74.4233758 W	✓	MK615017	MK628648	✗	✗
This study - Colección de Artrópodos Universidad del Rosario	E249	Dichotomius satanas	Dichotomius s.s.	Mormon	La Honda, Cundinamarca - Colombia	4.2553654 N	74.4233758 W	✓	✗	✗	✗	✗
This study - Colección de Artrópodos Universidad del Rosario	E252	Dichotomius satanas	Dichotomius s.s.	Mormon	La Honda, Cundinamarca - Colombia	4.2553654 N	74.4233758 W	✓	MK615018	✗	MK614955	✗
This study - Colección de Artrópodos Universidad del Rosario	E253	Dichotomius satanas	Dichotomius s.s.	Mormon	La Honda, Cundinamarca - Colombia	4.2553654 N	74.4233758 W	✓	MK615019	MK628649	✗	✗
This study - Colección de Artrópodos Universidad del Rosario	E254	Dichotomius satanas	Dichotomius s.s.	Mormon	La Honda, Cundinamarca - Colombia	4.2553654 N	74.4233758 W	✗	MK615020	MK628650	✗	✗
This study - Colección de Artrópodos Universidad del Rosario	E255	Dichotomius satanas	Dichotomius s.s.	Mormon	La Honda, Cundinamarca - Colombia	4.2553654 N	74.4233758 W	✗	MK615032	MK628679	✗	✗
This study - Colección de Artrópodos Universidad del Rosario	E256	Dichotomius satanas	Dichotomius s.s.	Mormon	La Honda, Cundinamarca - Colombia	4.2553654 N	74.4233758 W	✗	MK615033	MK628680	✗	✗
This study - Colección de Artrópodos Universidad del Rosario	E258	Dichotomius satanas	Dichotomius s.s.	Mormon	La Honda, Cundinamarca - Colombia	4.2553654 N	74.4233758 W	✓	✗	✗	✗	✗
This study - Colección de Artrópodos Universidad del Rosario	E259	Dichotomius satanas	Dichotomius s.s.	Mormon	La Honda, Cundinamarca - Colombia	4.2553654 N	74.4233758 W	✗	MK615034	MK628681	✗	✗
This study - Colección de Artrópodos Universidad del Rosario	E260	Dichotomius satanas	Dichotomius s.s.	Mormon	La Honda, Cundinamarca - Colombia	4.2553654 N	74.4233758 W	✓	MK615021	MK628651	✗	✗
This study - Colección de Artrópodos Universidad del Rosario	E263	Dichotomius satanas	Dichotomius s.s.	Mormon	La Honda, Cundinamarca - Colombia	4.2553654 N	74.4233758 W	✓	✗	✗	✗	✗
This study - Colección de Artrópodos Universidad del Rosario	E309	Dichotomius satanas	Dichotomius s.s.	Mormon	Villavicencio - Meta - Colombia	4° 9'11.66"N	73°38'42.52"W	✓	MK615022	✗	✗	✗
This study - Colección de Artrópodos Universidad del Rosario	E310	Dichotomius satanas	Dichotomius s.s.	Mormon	Villavicencio - Meta - Colombia	4° 9'11.66"N	73°38'42.52"W	✓	✗	✗	✗	✗
This study - Colección de Artrópodos Universidad del Rosario	E311	Dichotomius satanas	Dichotomius s.s.	Mormon	Villavicencio - Meta - Colombia	4° 9'11.66"N	73°38'42.52"W	✓	✗	MK628652	✗	✗
This study - Colección de Artrópodos Universidad del Rosario	E312	Dichotomius satanas	Dichotomius s.s.	Mormon	Villavicencio - Meta - Colombia	4° 9'11.66"N	73°38'42.52"W	✓	✗	✗	✗	✗
This study - Colección de Artrópodos Universidad del Rosario	E313	Dichotomius satanas	Dichotomius s.s.	Mormon	Villavicencio - Meta - Colombia	4° 9'11.66"N	73°38'42.52"W	✓	✗	✗	✗	✗
This study - Colección de Artrópodos Universidad del Rosario	E314	Dichotomius satanas	Dichotomius s.s.	Mormon	Villavicencio - Meta - Colombia	4° 9'11.66"N	73°38'42.52"W	✗	MK615006	MK628668	✗	✗
This study - Colección de Artrópodos Universidad del Rosario	E318	Dichotomius satanas	Dichotomius s.s.	Mormon	Pance - Valle del Cauca - Colombia	3º22'24.95'' N	76º23'46.25'' W	✓	✗	✗	✗	✗
This study - Colección de Artrópodos Universidad del Rosario	E319	Dichotomius satanas	Dichotomius s.s.	Mormon	Pance - Valle del Cauca - Colombia	3º22'24.95'' N	76º23'46.25'' W	✗	MK615007	MK628669	✗	✗
This study - Colección de Artrópodos Universidad del Rosario	E320	Dichotomius satanas	Dichotomius s.s.	Mormon	Vereda la Playa, El Tambo - Cauca - Colombia	2º42'52'18'' N	76º55'20.36'' W	✓	✗	✗	✗	✗
This study - Colección de Artrópodos Universidad del Rosario	E323	Dichotomius satanas	Dichotomius s.s.	Mormon	Vereda la Playa, El Tambo - Cauca - Colombia	2º42'52'18'' N	76º55'20.36'' W	✗	MK615009	✗	✗	✗
This study - Colección de Artrópodos Universidad del Rosario	E324	Dichotomius satanas	Dichotomius s.s.	Mormon	Vereda la Playa, El Tambo - Cauca - Colombia	2º42'52'18'' N	76º55'20.36'' W	✗	✗	MK628670	✗	✗
This study - Colección de Artrópodos Universidad del Rosario	E327	Dichotomius satanas	Dichotomius s.s.	Mormon	Vereda la Playa, El Tambo - Cauca - Colombia	2º42'52'18'' N	76º55'20.36'' W	✓	✗	✗	✗	✗
This study - Colección de Artrópodos Universidad del Rosario	E328	Dichotomius satanas	Dichotomius s.s.	Mormon	Vereda la Playa, El Tambo - Cauca - Colombia	2º42'52'18'' N	76º55'20.36'' W	✓	MK615023	MK628655	✗	✗
This study - Colección de Artrópodos Universidad del Rosario	E329	Dichotomius satanas	Dichotomius s.s.	Mormon	Vereda la Playa, El Tambo - Cauca - Colombia	2º42'52'18'' N	76º55'20.36'' W	✓	✗	MK628656	✗	✗
This study - Colección de Artrópodos Universidad del Rosario	E330	Dichotomius satanas	Dichotomius s.s.	Mormon	Vereda la Playa, El Tambo - Cauca - Colombia	2º42'52'18'' N	76º55'20.36'' W	✓	MK615024	MK628657	MK614956	✗
GenBank	BMNH900240	Dichotomius satanas	Dichotomius s.s.	Mormon	NA	NA	NA	✗	JQ972354.1	✗	✗	✗
GenBank	BMNH900241	Dichotomius satanas	Dichotomius s.s.	Mormon	NA	NA	NA	✗	JQ972355.1	✗	✗	✗
GenBank	BMNH900273	Dichotomius satanas	Dichotomius s.s.	Mormon	NA	NA	NA	✗	JQ972384.1	✗	✗	✗
GenBank	BMNH669389	Dichotomius satanas	Dichotomius s.s.	Mormon	NA	NA	NA	✗	JQ972253.1	✗	✗	✗
GenBank	BMNH900204	Dichotomius satanas	Dichotomius s.s.	Mormon	NA	NA	NA	✗	JQ972334.1	✗	✗	✗
GenBank	BMNH668645	Dichotomius satanas	Dichotomius s.s.	Mormon	NA	NA	NA	✗	JQ972180.1	✗	✗	✗
GenBank	BMNH900274	Dichotomius satanas	Dichotomius s.s.	Mormon	NA	NA	NA	✗	JQ972385.1	✗	✗	✗
GenBank	BMNH900276	Dichotomius satanas	Dichotomius s.s.	Mormon	NA	NA	NA	✗	JQ972386.1	✗	✗	✗
GenBank	BMNH900338	Dichotomius satanas	Dichotomius s.s.	Mormon	NA	NA	NA	✗	JQ972424.1	✗	✗	✗
GenBank	BMNH900341	Dichotomius satanas	Dichotomius s.s.	Mormon	NA	NA	NA	✗	JQ972427.1	✗	✗	✗
GenBank	BMNH900344	Dichotomius satanas	Dichotomius s.s.	Mormon	NA	NA	NA	✗	JQ972429.1	✗	✗	✗
GenBank	BMNH900345	Dichotomius satanas	Dichotomius s.s.	Mormon	NA	NA	NA	✗	JQ972430.1	✗	✗	✗
GenBank	BMNH900346	Dichotomius satanas	Dichotomius s.s.	Mormon	NA	NA	NA	✗	JQ972431.1	✗	✗	✗
GenBank	BMNH900347	Dichotomius satanas	Dichotomius s.s.	Mormon	NA	NA	NA	✗	JQ972432.1	✗	✗	✗
GenBank	BMNH900348	Dichotomius satanas	Dichotomius s.s.	Mormon	NA	NA	NA	✗	JQ972433.1	✗	✗	✗
GenBank	BMNH900381	Dichotomius satanas	Dichotomius s.s.	Mormon	NA	NA	NA	✗	JQ972462.1	✗	✗	✗
GenBank	BMNH900384	Dichotomius satanas	Dichotomius s.s.	Mormon	NA	NA	NA	✗	JQ972465.1	✗	✗	✗
GenBank	BMNH900386	Dichotomius satanas	Dichotomius s.s.	Mormon	NA	NA	NA	✗	JQ972466.1	✗	✗	✗
GenBank	BMNH900387	Dichotomius satanas	Dichotomius s.s.	Mormon	NA	NA	NA	✗	JQ972467.1	✗	✗	✗
GenBank	BMNH900424	Dichotomius satanas	Dichotomius s.s.	Mormon	NA	NA	NA	✗	JQ972491.1	✗	✗	✗
GenBank	BMNH900425	Dichotomius satanas	Dichotomius s.s.	Mormon	NA	NA	NA	✗	JQ972492.1	✗	✗	✗
GenBank	BMNH900426	Dichotomius satanas	Dichotomius s.s.	Mormon	NA	NA	NA	✗	JQ972493.1	✗	✗	✗
GenBank	BMNH900427	Dichotomius satanas	Dichotomius s.s.	Mormon	NA	NA	NA	✗	JQ972494.1	✗	✗	✗
GenBank	BMNH900190	Dichotomius satanas	Dichotomius s.s.	Mormon	NA	NA	NA	✗	JQ972655.1	✗	✗	✗
GenBank	BMNH900191	Dichotomius satanas	Dichotomius s.s.	Mormon	NA	NA	NA	✗	JQ972656.1	✗	✗	✗
This study - Colección Alejandro Lopera	141	Dichotomius worontzowi	Dichotomius s.s.	Mamillatus	El Naranjal - Meta - Colombia	4° 2'46.69" N	73°16'1.95" W	✓	✗	✗	✗	✗
This study - Colección de Artrópodos Universidad del Rosario	E190	Dichotomius yucatanus	Selenocopris	Inachus	La Vega - Cundinamarca - Colombia	5° 0'1.90"N	74°20'21.98"W	✓	MK614991	MK628625	✗	✗
This study - Colección de Artrópodos Universidad del Rosario	E191	Dichotomius yucatanus	Selenocopris	Inachus	La Vega - Cundinamarca - Colombia	5° 0'1.90"N	74°20'21.98"W	✗	MK614992	MK628626	✗	✗
This study - Colección de Artrópodos Universidad del Rosario	E192	Dichotomius yucatanus	Selenocopris	Inachus	La Vega - Cundinamarca - Colombia	5° 0'1.90"N	74°20'21.98"W	✓	MK614993	MK628627	✗	✗
This study - Colección de Artrópodos Universidad del Rosario	E193	Dichotomius yucatanus	Selenocopris	Inachus	La Vega - Cundinamarca - Colombia	5° 0'1.90"N	74°20'21.98"W	✓	MK614994	MK628628	✗	✗
GenBank	FO24. UNSM	Dichotomius yucatanus	Selenocopris	Inachus	Nicaragua, Mataglapa	NA	NA	✗	✗	✗	DQ430904.1	✗
GenBank	BMNH679801	Dichotomius yucatanus	Selenocopris	Inachus	Costa Rica	NA	NA	✗	AY131876.1	✗	AY131705.1	AY131516.1
This study - Colección Alejandro Lopera	135	Dichotomius yucatanus falax	Selenocopris	Inachus	Piojo - Atlántico - Colombia	10º45'47" N	75º09'28" W	✓	✗	✗	✗	✗
This study - Colección de Artrópodos Universidad del Rosario	E01	Deltochilum larseni	NA	NA	Cubarral - Meta - Colombia	03º59'39" N	73º53'15" W	✗				✗
GenBank	isolate 7C	Neateuchus proboscideus	NA	NA	South Africa	NA	NA	✗	AF499757.1	AF499757.1	✗	AF499697.1
GenBank	NA	Ontherus diabolicus	NA	NA	NA	NA	NA	✗	✗	AY131881.1	AY131710.1	AY131521.1
GenBank	NA	Pedaria sp._dg1	NA	NA	NA	NA	NA	✗	✗	AY131882.1	AY131711.1	AY131522.1
GenBank	NA	Panelus sp. dg1	NA	NA	NA	NA	NA	✗	✗	AY131842.1	AY131664.1	AY131472.1
GenBank	BMNH:703639	Australammoecius occidentalis	NA	NA	NA	NA	NA	✗	✗	AY132380.1	EF656732.1	EF487822.1
GenBank	BMNH:836005	Euphoresia sp.	NA	NA	NA	NA	NA	✗	✗	KT303555.1	KT303048.1	KT304177.1
GenBank	BMNH:679909	Brindalus porcicollis	NA	NA	NA	NA	NA	✗	✗	EF656776.1	EF656727.1	EF656685.1
GenBank	BMNH:792210	Pleurophorus caesus	NA	NA	NA	NA	NA	✗	✗	EF656786.1	EF656737.1	JN969135.1
