# Supplementary material for: Taxonomic reassessment of the genus Dichotomius (Coleoptera: Scarabaeinae) through integrative taxonomy
Source: PeerJ. 2019 Aug 5;7:e7332. doi: 10.7717/peerj.7332 (PMC6686840; doi:10.7717/peerj.7332)
Supplement: Table S2 — Length is in bp. [file peerj-07-7332-s009.xlsx]

## Sheet: Sheet1
Locus	Size (bp)	Substitution model	BIC score
COI	1486	GTR+F+I+G4	18613.6
28S	665	K3P+I+G4	3552.62
16S	392	TVM+F+G4	4178.13
